# Supplementary material
Source: Springer Nature journal article supplement (https://www.springermedizin.de/resource/supplementary/12950_2012_293_MOESM9_ESM.pdf/9557504)

**A****MO-THP1**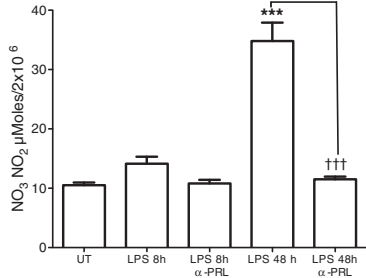**B****MO-PBMC**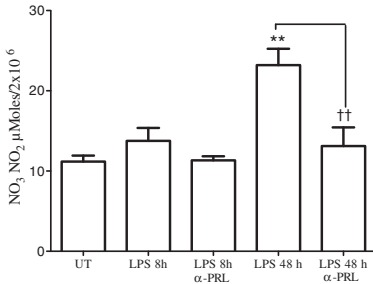

Supplement: MOESM9 [file 9557504]
